# Supplementary material for: Pots vs trammel nets: a catch comparison study in a Mediterranean small-scale fishery
Source: PeerJ. 2020 Jul 17;8:e9287. doi: 10.7717/peerj.9287 (PMC7370935; doi:10.7717/peerj.9287)
Supplement: Supplemental Information 1 — SE: Standard Error; GTR: Trammel nets; LP: large pots; SP: small pots. [file peerj-08-9287-s001.docx]

**Supplementary Table 1. Average catch per unit effort of the landed species, standardized in weight (CPUEW), for the three gears in the three sites. The most important species commented in the text are highlighted in bold. SE: Standard Error; GTR: Trammel nets; LP: large pots; SP: small pots.**

|  | **Marina di Ravenna** | | | **Senigallia** | | | **Portonovo** | |
| --- | --- | --- | --- | --- | --- | --- | --- | --- |
| **Species** | **GTR CPUE***W* **(mean ± SE)** | **LP CPUE*W* (mean ± SE)** | **SP CPUE*W* (mean ± SE)** | **GTR CPUE*W* (mean ± SE)** | **LP CPUE*W* (mean ± SE)** | **SP CPUE*W* (mean ± SE)** | **GTR CPUE*W* (mean ± SE)** | **SP CPUE*W* (mean ± SE)** |
| **FISHES** |  |  |  |  |  |  |  |  |
| *Boops boops* | **-** | 0.017 ± 0.001 | **-** | **-** | - | - | **-** | **-** |
| *Chelidonichthys lucernus* | - | 0.001 ± 0.001 | - | 0.024 ± 0.010 | - | - | - | - |
| ***Conger conger*** | **-** | **0.462 ± 0.262** | **0.097 ± 0.097** | **-** | **-** | **-** | **-** | **-** |
| ***Dentex dentex*** | **-** | **-** | **-** | **-** | **-** | **-** | **-** | **0.328 ± 0.328** |
| ***Diplodus annularis*** | **0.118 ± 0.118** | **0.356 ± 0.136** | **0.126 ± 0.054** | **0.569 ± 0.138** | **0.328 ± 0.131** | **0.730 ± 0.195** | **-** | **-** |
| *Diplodus vulgaris* | 0.019 ± 0.019 | 0.007 ± 0.004 | - | - | - | - | - | 0.091 ± 0.091 |
| *Gobius niger* | - | - | - | 0.076 ± 0.037 | 0.023 ± 0.015 | 0.045 ± 0.020 | 0.028 ± 0.028 | - |
| *Gobius paganellus* | - | 0.001 ± 0.001 | 0.002 ± 0.002 | - | - | - | - | - |
| ***Lithognathus mormyrus*** | **-** | **-** | **0.017 ± 0.013** | **0.067 ± 0.053** | **0.383 ± 0.246** | **0.195 ± 0.132** | **0.053 ± 0.036** | **0.359 ± 0.246** |
| ***Liza aurata*** | **-** | **-** | **-** | **0.543 ± 0.362** | **-** | **-** | **-** | **-** |
| *Merlangius merlangus* | - | 0.001 ± 0.001 | - | - | - | - | - | - |
| ***Mugil cephalus*** | **-** | **0.028 ± 0.019** | **0.013 ± 0.013** | **-** | **-** | **-** | **0.304 ± 0.125** | **-** |
| *Mullus surmuletus* | 0.008 ± 0.008 | 0.005 ± 0.005 | 0.007 ± 0.007 | - | - | - | - | - |
| *Oblada melanura* | - | 0.010 ± 0.010 | - | - | - | - | - | - |
| *Pagellus erythrinus* | - | - | - | 0.021 ± 0.016 | - | - | - | - |
| *Raja asterias* | 0.016 ± 0.016 | - | - | - | - | - | - | - |
| ***Sarda sarda*** | **-** | **-** | **-** | **0.452 ± 0.452** | **-** | **-** | **-** | **-** |
| ***Sciaena umbra*** | **0.316 ± 0.179** | **2.384 ± 1.547** | **0.488 ± 0.209** | **0.081 ± 0.081** | **-** | **-** | **-** | **0.011 ± 0.007** |
| *Scomber scombrus* | - | - | - | 0.088 ± 0.059 | - | - | - | - |
| ***Scophthalmus rhombus*** | **-** | **-** | **-** | **0.252 ± 0.252** | **-** | **-** | **-** | **-** |
| *Scorpaena notata* | - | - | - | 0.014 ± 0.014 | - | - | - | - |
| *Scorpaena porcus* | - | - | - | - | - | - | 0.138 ± 0.058 | 0.006 ± 0.006 |
| *Scorpaena scrofa* | - | - | - | - | - | - | 0.024 ± 0.017 | 0.015 ± 0.015 |
| *Solea impar* | - | - | - | 0.011 ± 0.011 | - | - | - | - |
| *Solea lascaris* | 0.175 ± 0.121 | - | - | - | - | - | - | - |
| ***Solea solea*** | **0.792 ± 0.455** | **0.012 ± 0.010** | **0.021 ± 0.012** | **0.445 ± 0.188** | **-** | **-** | **-** | **0.011 ± 0.011** |
| *Sparus aurata* | - | - | - | 0.024 ± 0.024 | - | - | - | 0.005 ± 0.005 |
| *Sphyraena sphyraena* | - | - | - | 0.157 ± 0.082 | - | - | - | - |
| *Trachurus mediterraneus* | - | - | - | - | - | - | 0.014 ± 0.014 | - |
| *Trachurus spp.* | - | - | - | 0.015 ± 0.015 | - | 0.019 ± 0.019 | - | - |
| *Umbrina cirrosa* | 0.154 ± 0.154 | - | - | 0.105 ± 0.079 | - | 0.006 ± 0.006 | 0.030 ± 0.030 | - |
| **CRUSTACEANS** |  |  |  |  |  |  |  |  |
| *Homarus gammarus* | 0.013 ± 0.013 | - | - | - | - | 0.041 ± 0.041 | - | - |
| *Maja crispata* | - | - | - | - | - | 0.004 ± 0.004 | - | - |
| *Maja squinado* | - | - | - | 0.222 ± 0.222 | - | - | - | - |
| *Melicertus kerathurus* | - | - | - | 0.120 ± 0.041 | - | - | - | 0.008 ± 0.008 |
| ***Squilla mantis*** | **0.447 ± 0.181** | **-** | **0.001 ± 0.001** | **0.033 ± 0.024** | **-** | **-** | **-** | **-** |
| **MOLLUSCS** |  |  |  |  |  |  |  |  |
| *Octopus vulgaris* | - | - | - | - | - | 0.116 ± 0.116 | - | 0.091 ± 0.091 |
| ***Sepia officinalis*** | **1.999 ± 0.518** | **4.007 ± 0.952** | **2.962 ± 0.562** | **1.024 ± 0.572** | **0.951 ± 0.570** | **1.931 ± 0.343** | **2.069 ± 0.552** | **1.558 ± 0.371** |
