# Supplementary material for: Pots vs trammel nets: a catch comparison study in a Mediterranean small-scale fishery
Source: PeerJ. 2020 Jul 17;8:e9287. doi: 10.7717/peerj.9287 (PMC7370935; doi:10.7717/peerj.9287)
Supplement: Supplemental Information 2 — SE: Standard Error; GTR: Trammel nets; LP: large pots; SP: small pots. [file peerj-08-9287-s002.docx]

**Supplementary Table 2. Average CPUEW, standardized in weight, of the discarded species caught by the three gears in the three sites. The most important species commented in the text are highlighted in bold. SE: Standard Error; GTR: Trammel nets; LP: large pots; SP: small pots.**

|  | **Marina di Ravenna** | | | **Senigallia** | | | **Portonovo** | |
| --- | --- | --- | --- | --- | --- | --- | --- | --- |
| **Species** | **GTR CPUE*W*** **(mean ± SE)** | **LP CPUE*W* (mean ± SE)** | **SP CPUE*W*  (mean ± SE)** | **GTR CPUE*W* (mean ± SE)** | **LP CPUE*W* (mean ± SE)** | **SP CPUE*W*  (mean ± SE)** | **GTR CPUE*W* (mean ± SE)** | **SP CPUE*W* (mean ± SE)** |
| **FISHES** |  |  |  |  |  |  |  |  |
| ***Alosa fallax*** | **0.240 ± 0.143** | **-** | **-** | **0.577 ± 0.473** | **-** | **-** | **-** | **-** |
| *Blennius ocellaris* | - | - | - | - | **-** | **-** | 0.007 ± 0.007 | - |
| *Boops boops* | - | 0.011 ± 0.008 | - | 0.026 ± 0.018 | - | - | - | - |
| *Chelidonichthys lucernus* | 0.034 ± 0.021 | 0.001 ± 0.001 | - | 0.048 ± 0.033 | - | - | - | - |
| *Engraulis encrasicolus* | - | - | - | 0.051 ± 0.051 | - | - | - | - |
| *Gobius paganellus* | - | 0.001 ± 0.001 | 0.009 ± 0.007 | - | - | - | - | - |
| *Liza aurata* | 0.031 ± 0.031 | - | - | - | - | - | - | - |
| *Merlangius merlangus* | 0.048 ± 0.024 | - | - | - | - | - | - | - |
| ***Pteroplatytrygon violacea*** | **0.184 ± 0.088** | **-** | **-** | **-** | **-** | **-** | **-** | **-** |
| *Raja asterias* | - | - | - | 0.026 ± 0.024 | - | - | - | - |
| *Sardina pilchardus* | - | - | - | 0.019 ± 0.013 | - | - | - | - |
| *Sardinella aurita* | 0.013 ± 0.013 | - | - | - | - | - | - | - |
| *Sciaena umbra* | - | 0.012 ± 0.012 | 0.008 ± 0.008 | - | - | - | - | - |
| *Scomber japonicus* | 0.019 ± 0.019 | - | - | - | - | - | - | - |
| *Solea solea* | 0.006 ± 0.006 | 0.002 ± 0.002 | - | - | - | - | - | - |
| *Sparus aurata* | - | - | - | - | - | - | - | 0.005 ± 0.005 |
| *Symphodus tinca* | - | - | - | - | - | - | 0.067 ± 0.067 | - |
| *Umbrina cirrosa* | - | - | - | 0.015 ± 0.015 | - | - | - | - |
| **CRUSTACEANS** |  |  |  |  |  |  |  |  |
| ***Eriphia verrucosa*** | **-** | **-** | **-** | **-** | **-** | **-** | **0.137 ± 0.090** | **-** |
| *Homarus gammarus* | 0.011 ± 0.011 | - | - | - | - | - | 0.013 ± 0.013 | - |
| *Liocarcinus depurator* | 0.068 ± 0.038 | - | - | - | - | - | 0.019 ± 0.019 | - |
| ***Liocarcinus vernalis*** | **0.051 ± 0.032** | **-** | **-** | **0.109 ± 0.089** | **-** | **-** | **0.009 ± 0.009** | **-** |
| ***Maja crispata*** | **-** | **-** | **-** | **-** | **-** | **0.004 ± 0.004** | **0.173 ± 0.112** | **-** |
| *Squilla mantis* | 0.036 ± 0.020 | - | 0.001 ± 0.001 | - | - | - | - | - |
| **MOLLUSCS** |  |  |  |  |  |  |  |  |
| ***Hexaplex trunculus*** | **-** | **-** | **-** | **-** | **-** | **-** | **0.101 ± 0.082** | **-** |
| *Mytilus galloprovincialis* | - | - | - | - | - | - | 0.078 ± 0.060 | - |
| *Nassarius mutabilis* | - | - | - | - | - | - | 0.016 ± 0.016 | - |
| *Ostrea edulis* | - | - | - | - | - | - | 0.014 ± 0.014 | - |
